# Supplementary material for: Yeast lysates carrying the nucleoprotein from measles virus vaccine as a novel subunit vaccine platform to deliver Plasmodium circumsporozoite antigen
Source: PubMed Central journal article supplement (PMC5492716; doi:10.1186/s12936-017-1908-7), 2017-06-29

**A**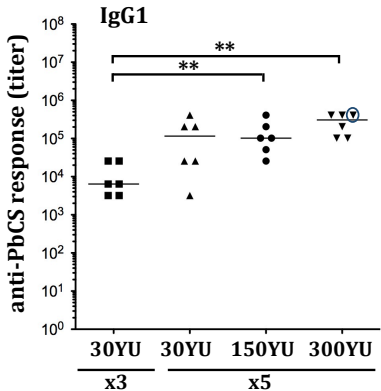**B**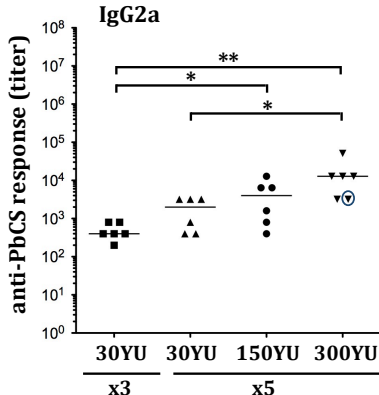**C**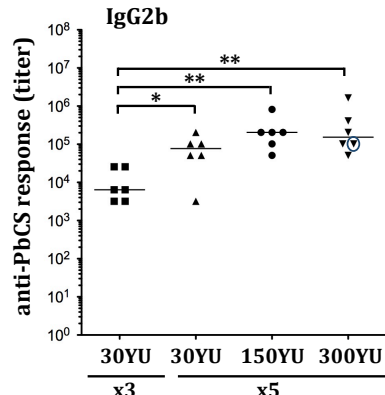

Supplement: 12936_2017_1908_MOESM3_ESM.pdf [file 12936_2017_1908_MOESM3_ESM.pdf]
