# Supplementary material for: Yeast lysates carrying the nucleoprotein from measles virus vaccine as a novel subunit vaccine platform to deliver Plasmodium circumsporozoite antigen
Source: Springer Nature journal article supplement (doi:10.1186/s12936-017-1908-7), 2017-06-29

**A 30YU x3**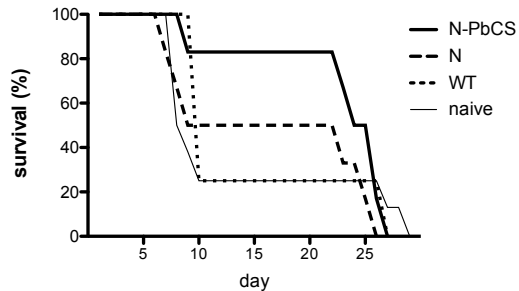**B 30YU x5**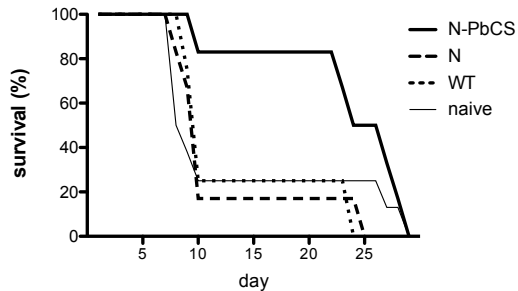**C 150YU x3**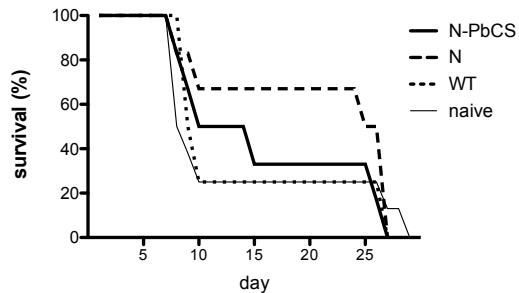**D 300YU x3**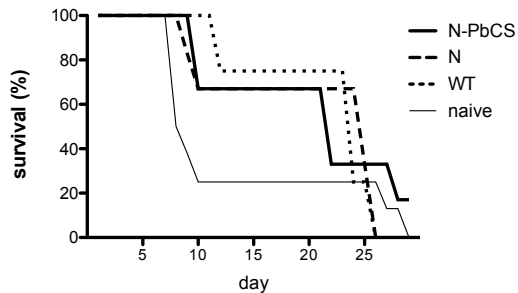

Supplement: MOESM4 [file 12493324]
