# Supplementary material for: Yeast lysates carrying the nucleoprotein from measles virus vaccine as a novel subunit vaccine platform to deliver Plasmodium circumsporozoite antigen
Source: Springer Nature journal article supplement (doi:10.1186/s12936-017-1908-7), 2017-06-29

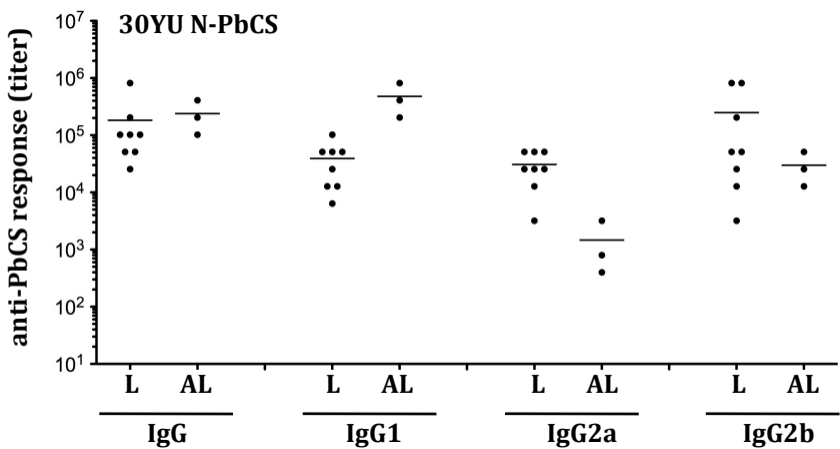

Supplement: MOESM6 [file 12493324]
